# Supplementary material for: Spaced Titania Nanotube Arrays Allow the Construction of an Efficient N‐Doped Hierarchical Structure for Visible‐Light Harvesting
Source: PubMed Central journal article supplement — ChemistryOpen. 2018 Jan 29;7(2):131–5. doi: 10.1002/open.201700199 (PMC5792828; doi:10.1002/open.201700199), 2018-01-29
Supplement: OPEN-7-131-s001.pdf [file OPEN-7-131-s001.pdf]

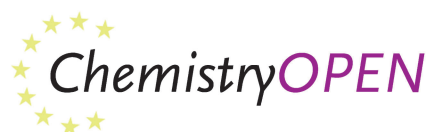

## Supporting Information

© 2018 The Authors. Published by Wiley-VCH Verlag GmbH & Co. KGaA, Weinheim

### **Spaced Titania Nanotube Arrays Allow the Construction of an Efficient N-Doped Hierarchical Structure for Visible-Light Harvesting**

Nhat Truong Nguyen,<sup>[a]</sup> Selda Ozkan,<sup>[a]</sup> Ondrej Tomanec,<sup>[b]</sup> Radek Zboril,<sup>[b]</sup> and Patrik Schmuki<sup>\*[a, b, c]</sup>

open\_201700199\_sm\_miscellaneous\_information.pdf

## Experimental Section

*Growth of TiO<sub>2</sub> nanotubes:* Titanium foils (Advent Research Materials, 0.125 mm thickness, 99.6+% purity) were degreased by sonication in acetone, ethanol and deionized water, followed by drying in N<sub>2</sub> gas stream. The TiO<sub>2</sub> nanotubes were formed by anodizing titanium foils in triethylene glycol electrolyte containing NH<sub>4</sub>F (0.3 M) and H<sub>2</sub>O (3 M), at 60 V for different times at 60 °C. The DC potential was applied by using a VLP 2403 pro, Voltcraft power supply. Right after the anodization, the samples were immersed in ethanol, and then dried under N<sub>2</sub> gas stream. Subsequently, the TiO<sub>2</sub> nanotubes were annealed at 450 °C in air for 1 h using a Rapid Thermal Annealer (Jipelec Jetfirst 100 RTA), with a heating and cooling rate of 30 °C min<sup>-1</sup>.

*Nanoparticle decoration:* For TiCl<sub>4</sub> treatments, aqueous TiCl<sub>4</sub> solutions (0.1 M) was prepared under ice-cooled conditions. The TiO<sub>2</sub> nanotube layers were then treated in a closed vessel at 70 °C for 30 min. Afterwards, the samples were washed with distilled water and rinsed with ethanol and finally dried in a N<sub>2</sub> gas stream; and this process was repeated several times. After these treatments, the samples were annealed again at 450 °C for 10 min to crystallize attached nanoparticles.

*Nitrogen doping:* TiO<sub>2</sub> samples were annealed in a pure NH<sub>3</sub> gas flow at 450 °C for different duration times. Before and after annealing, the chamber was flowed with N<sub>2</sub> gas.

*Characterization of the structure:* Field-emission scanning electron microscope (FE-SEM, Hitachi S4800) was used to characterize the morphology of the samples. The chemical composition of the samples was analyzed by X-ray photoelectron spectroscopy (XPS, PHI 5600, US). X-ray diffraction (XRD) performed with a X'pert Philips MPD (equipped with a Panalytical X'celerator detector) was employed to examine the crystallographic properties of the materials. High-resolution transmission electron microscopy (HRTEM, FEI TITAN G2 60-300) was used for TEM image, HAADF and EDS mapping.

*Photoelectrochemical spectra:* Photoelectrochemical spectra were conducted in 0.1 M Na<sub>2</sub>SO<sub>4</sub> under an applied potential of 0.5 V (vs. Ag/AgCl) in a three-electrode system using 150 W Xe-lamp (Oriel 6365) equipped with a Oriel Cornerstone 7400 1/8 m monochromator (illuminated area=0.785 cm<sup>2</sup>).

*Photoelectrochemical measurements:* The photoelectrochemical experiments were carried out under simulated AM 1.5G (100 mW cm<sup>-2</sup>) illumination provided by a solar simulator (300 W Xe with optical filter, Solarlight) equipped with a 420 nm cut-off filter. 0.1 M Na<sub>2</sub>SO<sub>4</sub> was used as an electrolyte. Photocurrent vs. voltage (I–V) characteristics were recorded by scanning the potential from –0.6 to 1.1 V (vs. Ag/AgCl (3 M KCl)) with a scan rate of 1 mV s<sup>-1</sup> using a Jaissle IMP 88 PC potentiostat.

*IMVS and IMPS:* Intensity modulated photovoltage and photocurrent spectroscopy (IMVS and IMPS) measurements were carried out using modulated light from a high power LED ( $\lambda$ =530 nm).

*Photocatalytic measurements:* Photodegradation of acetaldehyde was performed in a 15 mL quartz cell. 20  $\mu$ L of acetaldehyde was injected in liquid form using a micropipette. Before irradiation, the reaction vessel was kept in the dark for 30 min. The exposure area was 1 cm<sup>2</sup>. Gas chromatography (GCMS-QO2010SE, Shimadzu) was used to determine the concentration of CO<sub>2</sub>. Photocatalytic methylene blue (MB) decomposition runs were performed in a magnetically stirred quartz cuvette. The initial concentration of MB was 0.01 mM. The samples were immersed in the cuvette in the dark for 30 min to establish the dye adsorption/desorption equilibrium. In order to measure the decomposition rates of MB, the absorbance of the testing solutions was measured periodically every 30 min using a UV/Vis spectrometer at wavelength  $\lambda = 662$  nm. All photocatalytic measurements were conducted under visible light provided by a solar simulator AM 1.5 (300W Xe, 100 mW cm<sup>-2</sup>, Solarlight) equipped with a 420 nm cut-off filter.

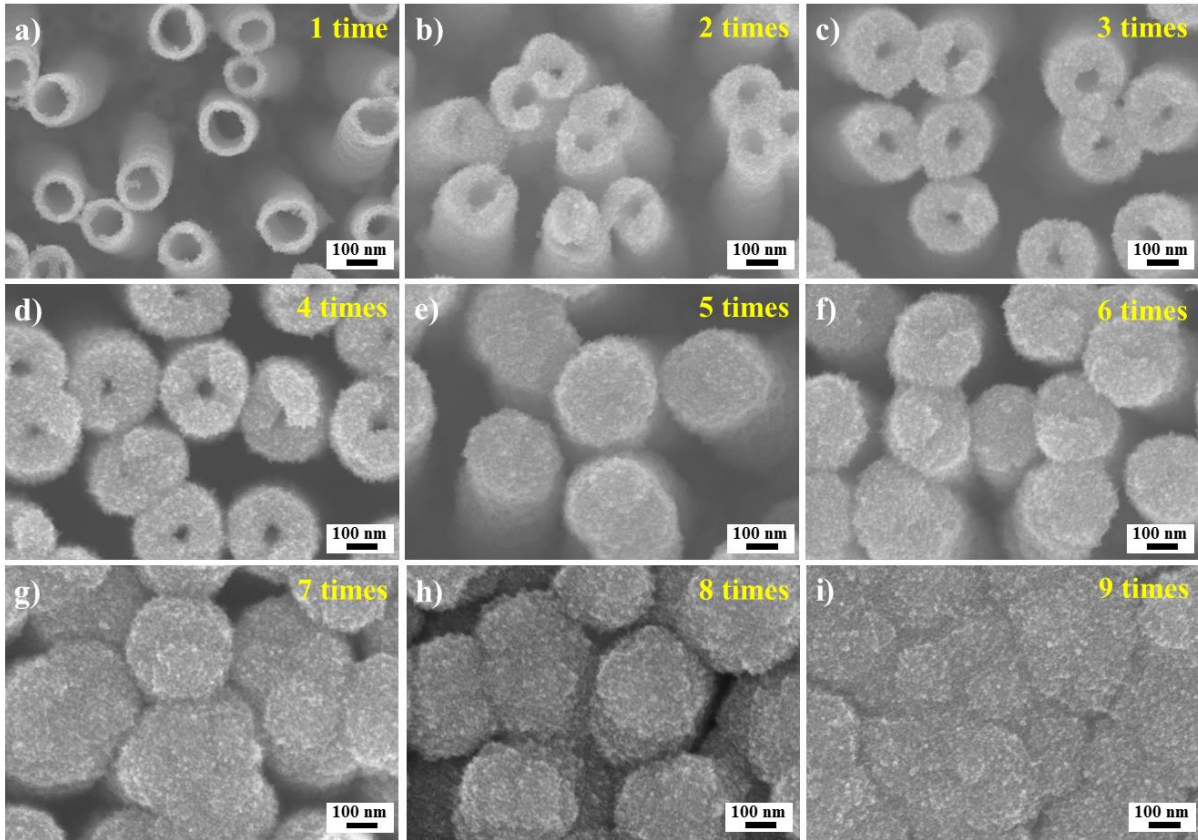

**Figure S1.** SEM images of spaced TiO<sub>2</sub> nanotubes decorated with different layers of TiO<sub>2</sub> nanoparticles (1-9 layers).

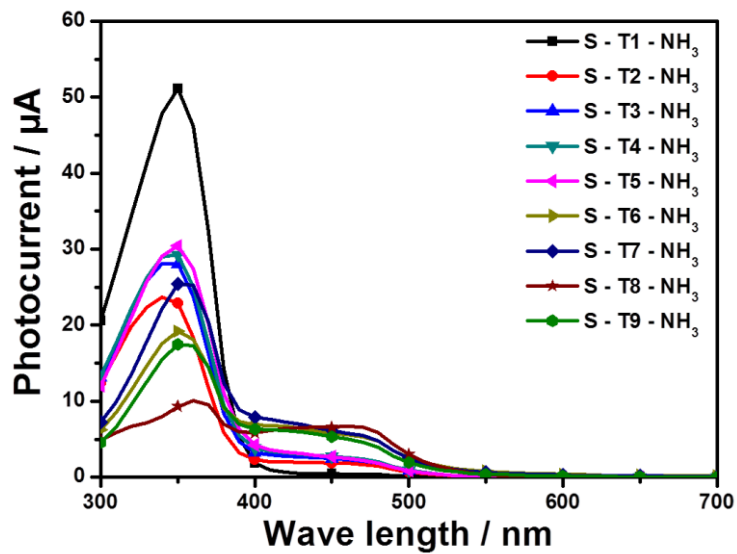

**Figure S2.** Photocurrent spectra of N-doped spaced TiO<sub>2</sub> nanotubes decorated with different layers of TiO<sub>2</sub> nanoparticles.

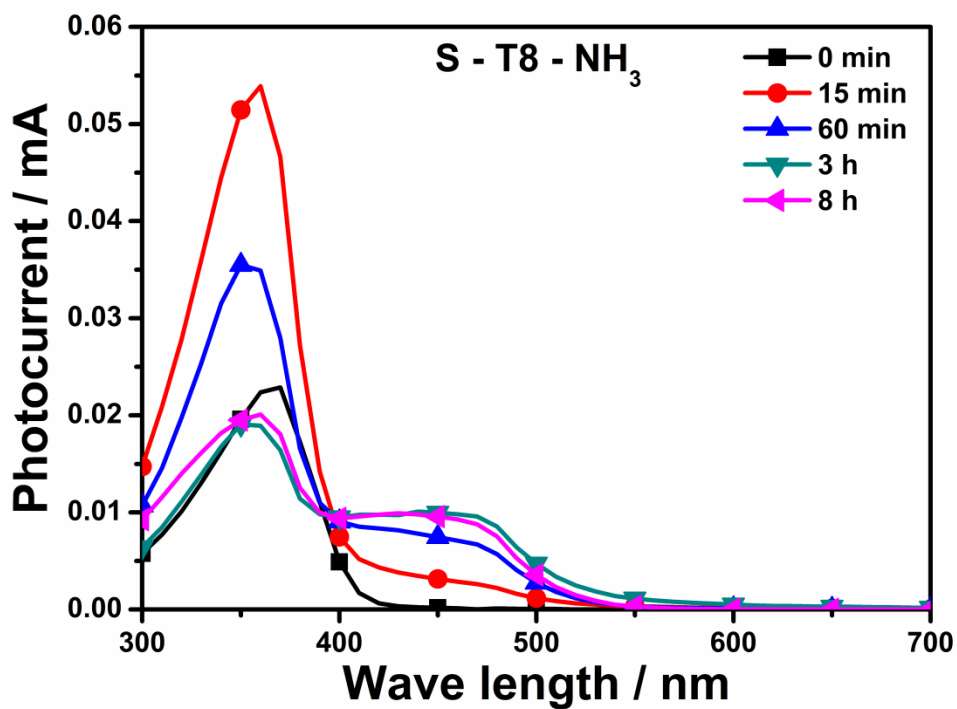

**Figure S3.** Photocurrent spectra of N-doped spaced TiO<sub>2</sub> nanotubes decorated with different layers of nanoparticles at 450°C for different times.

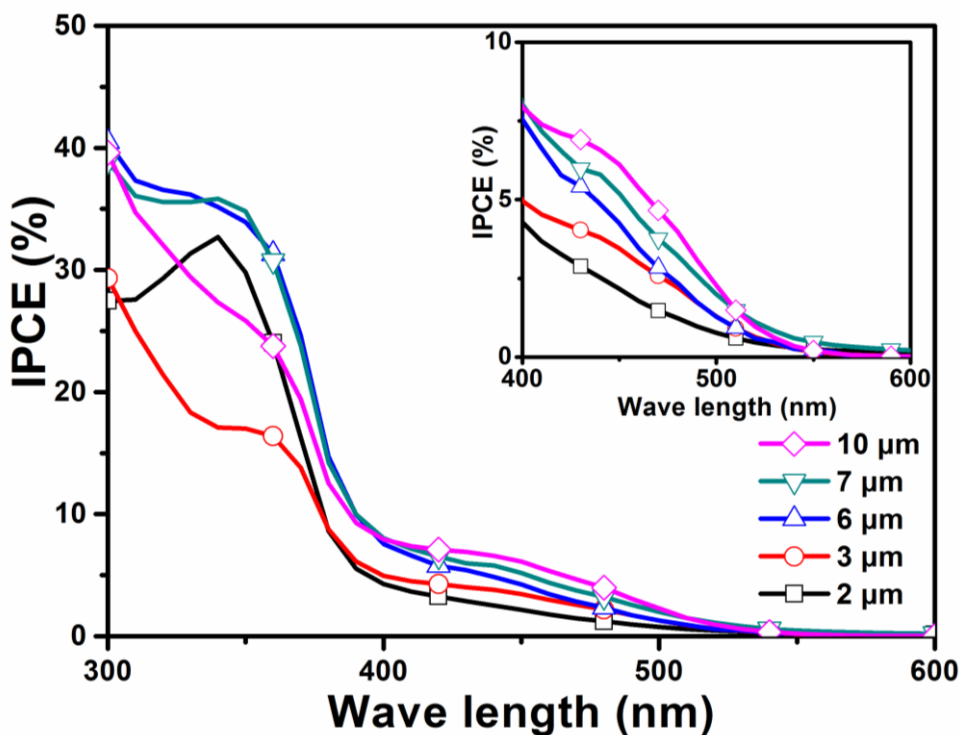

**Figure S4.** IPCE of N-doped hierarchical spaced TiO<sub>2</sub> nanotubes (eight layers of TiO<sub>2</sub> NPs) of different thicknesses.

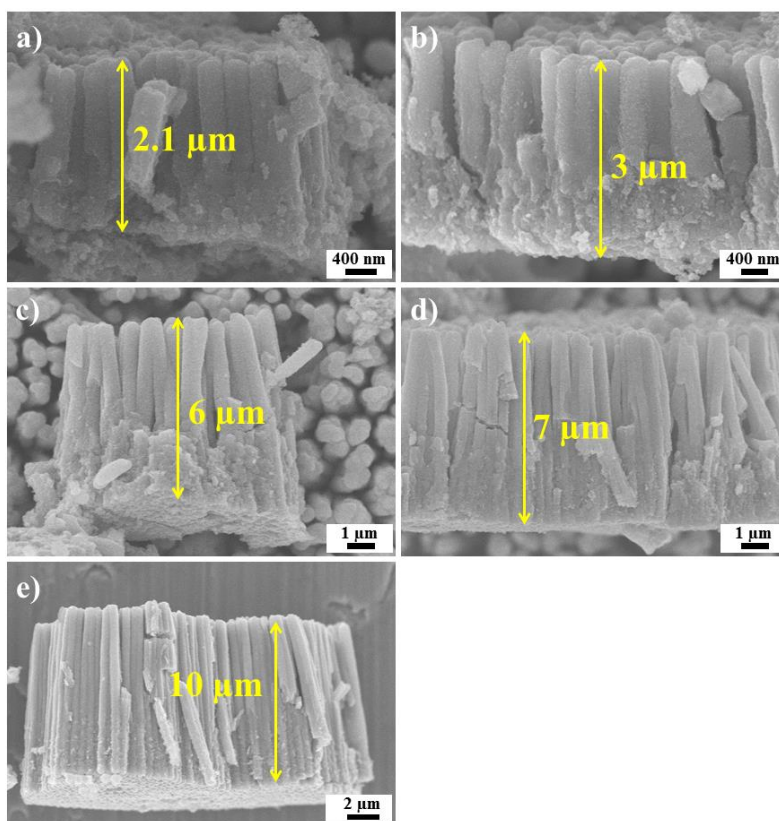

**Figure S5.** Cross-section SEM images of different thicknesses of spaced TiO<sub>2</sub> NTs decorated with 8 layers of nanoparticles; a) 2, b) 3, c) 6, d) 7 and e) 10 μm.

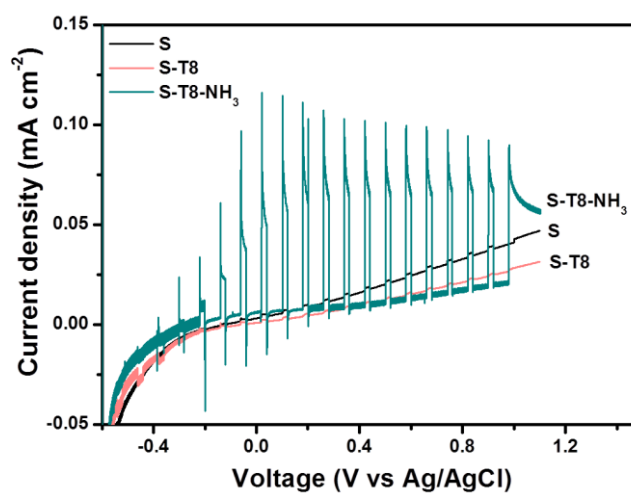

**Figure S6.** Photocurrent density vs. potential curves under chopped visible light (AM 1.5, 100 mW cm<sup>-2</sup>, 420 nm cut-off filter) illumination of spaced TiO<sub>2</sub> nanotubes (S), spaced TiO<sub>2</sub> nanotubes decorated with 8 layers of nanoparticles (S-T8) and N-doped spaced TiO<sub>2</sub> nanotubes decorated with 8 layers of nanoparticles (S-T8-NH<sub>3</sub>).

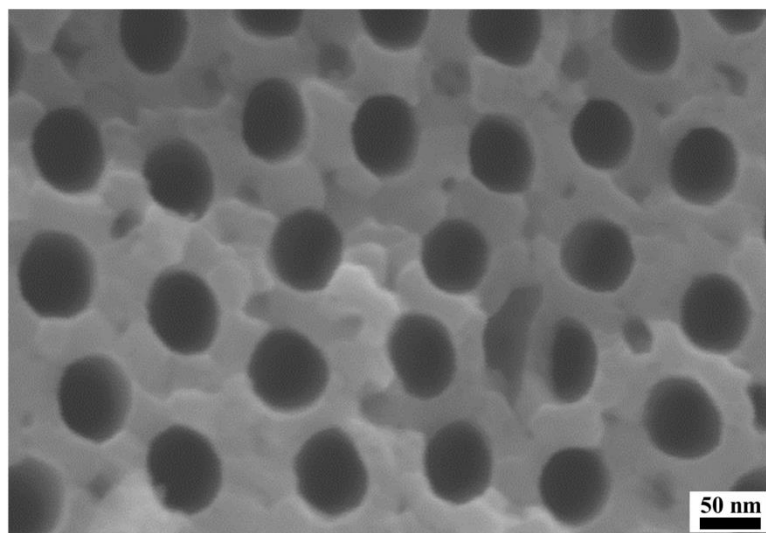

**Figure S7.** SEM image of conventional close-packed TiO<sub>2</sub> nanotubes.

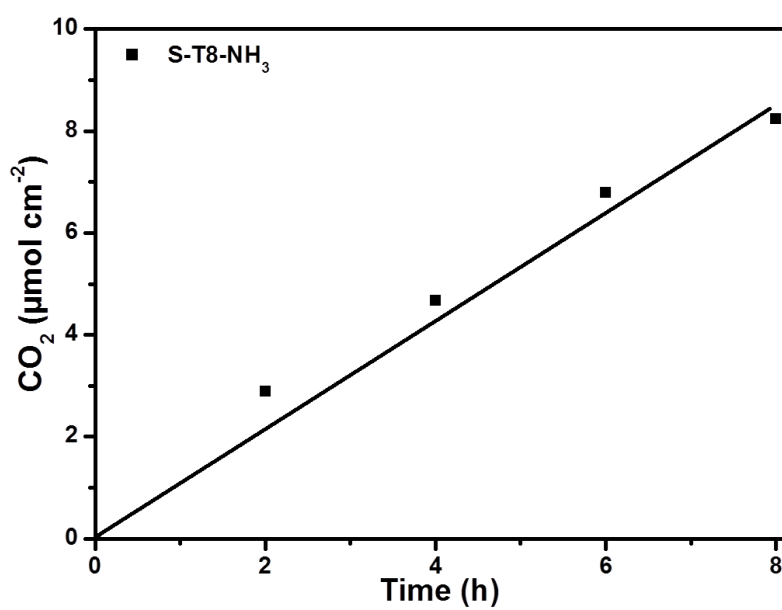

**Figure S8.** Photocatalytic CO<sub>2</sub> evolution rate during the photodegradation of acetaldehyde (AM 1.5, 100 mW cm<sup>-2</sup>, 420 nm cut-off filter).
